# Supplementary material for: Subtle changes in topsoil microbial communities of drained forested peatlands after prolonged drought
Source: PubMed Central journal article supplement (PMC11544035; doi:10.1111/1758-2229.70041), 2024-11-07
Supplement: EMI4-16-e70041-s001.pdf [file EMI4-16-e70041-s001.pdf]

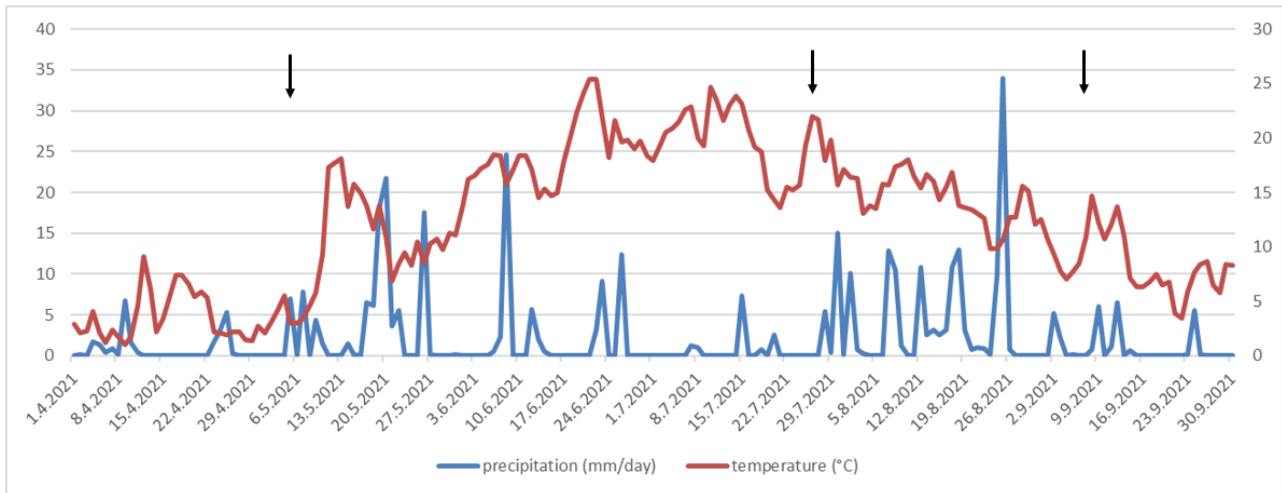

**Supplemental Figure 1.** Daily precipitation (blue; left axis) and air temperature (red; right axis) during the growing season of 2021. The sampling times for soil microbial community analysis are marked with black arrows.
