# Supplementary material for: Subtle changes in topsoil microbial communities of drained forested peatlands after prolonged drought
Source: PubMed Central journal article supplement (PMC11544035; doi:10.1111/1758-2229.70041), 2024-11-07
Supplement: EMI4-16-e70041-s002.pdf [file EMI4-16-e70041-s002.pdf]

**Supplemental table 2:** Good's coverage and Alpha diversity and richness indices per sample for A) bacteria and B) fungi. Cc refers to clear cut and CCF to continuous cover forestry. A, B and C are marking the sample replicants.

**A)**

|                | Observed species | Chao1      | se.chao1  | ACE        | se.ACE    | Shannon  | Simpson   | Goods Coverage |
|----------------|------------------|------------|-----------|------------|-----------|----------|-----------|----------------|
| Cc.A.spring    | 65               | 74.23077   | 6.164647  | 76.44200   | 4.117190  | 2.415824 | 0.8479068 | 0.9979790      |
| Cc.B.spring    | 1193             | 1462.26271 | 37.280122 | 1492.26724 | 18.379257 | 5.885424 | 0.9844874 | 0.9549072      |
| Cc.C.spring    | 1082             | 1316.00476 | 34.544194 | 1349.76892 | 17.716031 | 5.814416 | 0.986944  | 0.9603385      |
| CCF.A.spring   | 764              | 972.13333  | 36.648989 | 996.83103  | 16.171973 | 5.639940 | 0.9918855 | 0.9717065      |
| CCF.B.spring   | 1300             | 1650.10728 | 44.341714 | 1698.72104 | 20.650924 | 6.165668 | 0.9940433 | 0.9459391      |
| CCF.C.spring   | 979              | 1242.55346 | 40.731456 | 1247.39149 | 17.574919 | 5.961312 | 0.9936123 | 0.9633700      |
| Uncut.A.spring | 1268             | 1536.89362 | 37.282029 | 1557.08195 | 18.541595 | 6.338014 | 0.9961407 | 0.9550335      |
| Uncut.B.spring | 872              | 1161.10791 | 45.469629 | 1180.94618 | 18.220937 | 5.814727 | 0.994477  | 0.9641278      |
| Uncut.C.spring | 725              | 825.30928  | 22.192879 | 817.72977  | 13.605182 | 5.759971 | 0.9937175 | 0.9823165      |
| Cc.A.summer    | 72               | 84.21429   | 7.433585  | 89.43905   | 4.533185  | 2.837238 | 0.9032591 | 0.9976001      |
| Cc.B.summer    | 202              | 261.00000  | 20.370228 | 269.25398  | 9.002734  | 3.737141 | 0.9618566 | 0.9925477      |
| Cc.C.summer    | 186              | 267.05882  | 30.824453 | 260.12989  | 8.685682  | 3.889431 | 0.960197  | 0.9933055      |
| CCF.A.summer   | 636              | 875.40000  | 46.971498 | 835.35577  | 14.868940 | 5.447440 | 0.9917381 | 0.9760010      |
| CCF.C.summer   | 621              | 734.47826  | 24.690678 | 744.29876  | 13.532174 | 5.530565 | 0.9924349 | 0.9816850      |
| Uncut.A.summer | 409              | 587.41892  | 37.266334 | 597.08139  | 13.138658 | 3.336946 | 0.8790638 | 0.9794114      |
| Cc.A.autumn    | 144              | 153.37500  | 5.165970  | 160.89634  | 6.090261  | 3.231195 | 0.9350569 | 0.9968422      |
| Cc.B.autumn    | 145              | 179.87097  | 13.362680 | 184.59106  | 7.202277  | 2.420114 | 0.7992015 | 0.9940634      |
| CCF.A.autumn   | 159              | 161.05263  | 1.888639  | 164.68473  | 5.577085  | 2.972742 | 0.8941399 | 0.9983580      |
| CCF.B.autumn   | 273              | 415.80000  | 35.041297 | 447.81933  | 13.307960 | 3.224263 | 0.9258259 | 0.9848427      |
| CCF.C.autumn   | 366              | 469.84146  | 23.780671 | 491.34495  | 11.019730 | 3.378874 | 0.9314697 | 0.9834533      |
| Uncut.A.autumn | 244              | 390.87234  | 36.517472 | 442.79740  | 13.053240 | 3.020396 | 0.8949503 | 0.9850954      |
| Uncut.B.autumn | 304              | 415.72414  | 33.931953 | 413.05124  | 10.408476 | 4.731478 | 0.9835380 | 0.9897689      |
| Uncut.C.autumn | 259              | 341.65000  | 29.773119 | 322.72778  | 9.204503  | 4.515947 | 0.9811892 | 0.9926740      |

**B)**

|                | Observed species | Chao1    | se.chao1   | ACE      | se.ACE    | Shannon  | Simpson   | Goods Coverage |
|----------------|------------------|----------|------------|----------|-----------|----------|-----------|----------------|
| Cc.B.spring    | 507              | 609.2381 | 25.2095317 | 593.6631 | 11.826733 | 3.867201 | 0.9396275 | 0.9939663      |
| Cc.C.spring    | 328              | 367.7826 | 13.3772749 | 372.2880 | 9.441306  | 3.667688 | 0.9416210 | 0.9967715      |
| CCF.B.spring   | 252              | 313.0000 | 20.7111752 | 316.1061 | 9.092963  | 3.496473 | 0.9320355 | 0.9967715      |
| CCF.C.spring   | 244              | 315.0909 | 22.7348113 | 314.9220 | 9.072855  | 3.756720 | 0.9493917 | 0.9944956      |
| Uncut.A.spring | 306              | 330.8485 | 10.2342779 | 330.3745 | 8.970323  | 3.692062 | 0.9398658 | 0.9978300      |
| Uncut.B.spring | 142              | 194.9286 | 23.0984446 | 206.2601 | 7.992507  | 3.384734 | 0.9391693 | 0.9979359      |
| Uncut.C.spring | 292              | 315.6500 | 9.4507267  | 329.8774 | 9.142894  | 4.137934 | 0.9643029 | 0.9976712      |
| Cc.C.autumn    | 823              | 909.5789 | 19.1291765 | 911.5804 | 14.431972 | 5.153214 | 0.9822990 | 0.9925373      |
| CCF.A.autumn   | 852              | 957.6250 | 21.2395545 | 975.0736 | 15.050386 | 5.124353 | 0.9831163 | 0.9910024      |
| CCF.B.autumn   | 425              | 425.3544 | 0.6542913  | 427.8747 | 9.926210  | 4.009554 | 0.9404299 | 0.9995766      |

|                       |     |          |            |          |           |          |           |           |
|-----------------------|-----|----------|------------|----------|-----------|----------|-----------|-----------|
| <b>CCF.C.autumn</b>   | 607 | 674.7975 | 17.4284238 | 677.4708 | 12.739683 | 4.871140 | 0.9820701 | 0.9963480 |
| <b>Uncut.A.autumn</b> | 735 | 819.8391 | 20.1136786 | 815.4582 | 14.032265 | 4.939325 | 0.9765202 | 0.9935429 |
| <b>Uncut.B.autumn</b> | 539 | 594.9429 | 15.5649785 | 594.5300 | 11.773386 | 4.551405 | 0.9684034 | 0.9952895 |
| <b>Uncut.C.autumn</b> | 540 | 618.9062 | 20.5844094 | 615.3595 | 12.283734 | 4.697213 | 0.9771289 | 0.9946544 |
