# Supplementary material for: Subtle changes in topsoil microbial communities of drained forested peatlands after prolonged drought
Source: PubMed Central journal article supplement (PMC11544035; doi:10.1111/1758-2229.70041), 2024-11-07
Supplement: EMI4-16-e70041-s003.pdf [file EMI4-16-e70041-s003.pdf]

**Supplemental Table 1.** The amplicon was sequenced on Illumina paired-end platform to generate 250 bp paired-end raw reads (Raw PE), and then merged and pretreated to obtain Clean Tags. The chimeric sequences in Clean Tags were detected and removed to obtain the Effective Tags which can be used for subsequent analysis. The summarizations obtained in each step of data processing are shown in the table.

| Sequence        | Sample Name        | Raw PE(#) | Combined(#) | Qualified(#) | Nochime(#) | Base(nt)   | AvgLen(nt) | Q20   | Q30   | GC%   | Effective% |
|-----------------|--------------------|-----------|-------------|--------------|------------|------------|------------|-------|-------|-------|------------|
| <b>Bacteria</b> | Clear-cut.A.spring | 25,613    | 24,790      | 24,553       | 24,245     | 10,212,587 | 421        | 98,72 | 95,5  | 54,44 | 94,66      |
|                 | Clear-cut.B.spring | 142,367   | 123,865     | 122,560      | 100,059    | 41,088,338 | 411        | 98,26 | 94,5  | 56,4  | 70,28      |
|                 | Clear-cut.C.spring | 112,668   | 98,343      | 97,265       | 67,705     | 27,774,262 | 410        | 98,26 | 94,49 | 56,67 | 60,09      |
|                 | Clear-cut.A.summe  | 23,638    | 22,656      | 22,391       | 22,104     | 9,411,225  | 426        | 98,61 | 95,24 | 54,47 | 93,51      |
|                 | Clear-cut.B.summe  | 29,807    | 28,838      | 28,523       | 26,354     | 11,119,209 | 422        | 98,68 | 95,48 | 54,7  | 88,42      |
|                 | Clear-cut.C.summe  | 51,798    | 49,625      | 48,884       | 41,749     | 17,536,769 | 420        | 98,56 | 95,07 | 51,91 | 80,6       |
|                 | Clear-cut.A.atumn  | 16,178    | 15,560      | 15,420       | 12,821     | 5,355,691  | 418        | 98,71 | 95,49 | 51,46 | 79,25      |
|                 | Clear-cut.B.atumn  | 20,697    | 20,054      | 19,807       | 18,965     | 8,109,053  | 428        | 98,67 | 95,35 | 53,72 | 91,63      |
|                 | CCF.A.spring       | 146,785   | 127,062     | 125,720      | 113,654    | 46,898,652 | 413        | 98,2  | 94,28 | 56,28 | 77,43      |
|                 | CCF.B.spring       | 154,583   | 134,401     | 132,881      | 115,847    | 47,590,185 | 411        | 98,29 | 94,53 | 56,57 | 74,94      |
|                 | CCF.C.spring       | 155,072   | 134,545     | 132,741      | 119,435    | 49,270,261 | 413        | 98,31 | 94,51 | 56,3  | 77,02      |
|                 | CCF.A.summer       | 183,701   | 175,920     | 174,217      | 161,948    | 67,185,527 | 415        | 98,62 | 95,21 | 56,71 | 88,16      |
|                 | CCF.C.summer       | 186,427   | 178,218     | 176,375      | 154,007    | 63,914,569 | 415        | 98,57 | 95,15 | 56,46 | 82,61      |
|                 | CCF.A.atumn        | 11,265    | 10,602      | 10,459       | 9,685      | 4,097,502  | 423        | 98,74 | 95,51 | 52,99 | 85,97      |
|                 | CCF.B.atumn        | 75,398    | 71,248      | 70,420       | 57,678     | 24,258,485 | 421        | 98,6  | 95,35 | 55,75 | 76,5       |
|                 | CCF.C.atumn        | 37,956    | 36,530      | 36,164       | 33,060     | 13,825,815 | 418        | 98,74 | 95,6  | 54,62 | 87,1       |
|                 | Uncut.A.spring     | 111,152   | 96,676      | 95,610       | 79,699     | 32,775,531 | 411        | 98,22 | 94,35 | 56,34 | 71,7       |
|                 | Uncut.B.spring     | 147,906   | 127,263     | 125,701      | 113,811    | 46,710,906 | 410        | 98,19 | 94,29 | 56,26 | 76,95      |
|                 | Uncut.C.spring     | 193,076   | 165,464     | 163,719      | 155,717    | 63,851,610 | 410        | 98,27 | 94,49 | 56,47 | 80,65      |
|                 | Uncut.A.summer     | 108,449   | 104,769     | 103,880      | 93,811     | 40,032,883 | 427        | 98,62 | 95,19 | 54,97 | 86,5       |
|                 | Uncut.A.atumn      | 91,711    | 88,732      | 87,626       | 83,392     | 35,680,923 | 428        | 98,69 | 95,43 | 54,61 | 90,93      |
|                 | Uncut.B.atumn      | 101,816   | 97,780      | 97,022       | 87,721     | 36,244,688 | 413        | 98,72 | 95,62 | 57,16 | 86,16      |
|                 | Uncut.C.atumn      | 146,493   | 140,234     | 138,855      | 124,642    | 51,942,510 | 417        | 98,56 | 95,06 | 56,55 | 85,08      |
|                 | Uncut.A.summer     | 108,449   | 104,769     | 103,880      | 93,811     | 40,032,883 | 427        | 98,62 | 95,19 | 54,97 | 86,5       |
| Uncut.C.atumn   | 146,493            | 140,234   | 138,855     | 124,642      | 51,942,510 | 417        | 98,56      | 95,06 | 56,55 | 85,08 |            |
| <b>Fungi</b>    | Clear-cut.B.spring | 124,329   | 119,337     | 117,088      | 109,578    | 37,913,063 | 346        | 98,94 | 96,35 | 48,68 | 88,14      |
|                 | Clear-cut.C.spring | 118,705   | 114,734     | 114,237      | 107,570    | 36,520,937 | 340        | 98,96 | 96,49 | 49,94 | 90,62      |
|                 | Clear-cut.C.atumn  | 117,652   | 58,011      | 56,222       | 55,099     | 7,831,878  | 142        | 99,15 | 97,33 | 48,71 | 46,83      |
|                 | CCF.B.spring       | 199,877   | 192,810     | 176,896      | 165,916    | 58,215,937 | 351        | 98,99 | 96,44 | 45,64 | 83,01      |
|                 | CCF.C.spring       | 183,816   | 175,758     | 173,973      | 160,258    | 53,456,678 | 334        | 99,04 | 96,76 | 46,08 | 87,18      |
|                 | CCF.A.atumn        | 98,594    | 62,886      | 19,370       | 18,223     | 5,286,067  | 290        | 99,09 | 96,96 | 50,77 | 18,48      |
|                 | CCF.B.atumn        | 27,296    | 18,995      | 13,309       | 12,810     | 4,719,639  | 368        | 98,64 | 95,48 | 46,09 | 46,93      |
|                 | CCF.C.atumn        | 108,271   | 59,199      | 23,008       | 20,532     | 6,896,484  | 336        | 99,17 | 96,98 | 47,1  | 18,96      |
|                 | Uncut.A.spring     | 184,672   | 179,486     | 129,546      | 118,399    | 41,680,519 | 352        | 98,93 | 96,26 | 46,48 | 64,11      |
|                 | Uncut.B.spring     | 127,196   | 123,669     | 122,520      | 117,694    | 41,054,021 | 349        | 98,94 | 96,32 | 47,15 | 92,53      |
|                 | Uncut.C.spring     | 117,565   | 113,865     | 110,784      | 105,026    | 35,314,282 | 336        | 99,02 | 96,66 | 48,12 | 89,33      |
|                 | Uncut.A.atumn      | 181,818   | 79,785      | 77,105       | 75,292     | 10,028,200 | 133        | 98,79 | 96,72 | 46,61 | 41,41      |
|                 | Uncut.B.atumn      | 56,408    | 35,925      | 24,906       | 23,872     | 5,392,443  | 226        | 99,29 | 97,37 | 48,81 | 42,32      |
|                 | Uncut.C.atumn      | 192,254   | 86,839      | 83,069       | 82,251     | 8,353,768  | 102        | 98,57 | 96,53 | 48,2  | 42,78      |
