# Supplementary material for: Subtle changes in topsoil microbial communities of drained forested peatlands after prolonged drought
Source: PubMed Central journal article supplement (PMC11544035; doi:10.1111/1758-2229.70041), 2024-11-07
Supplement: EMI4-16-e70041-s004.pdf [file EMI4-16-e70041-s004.pdf]

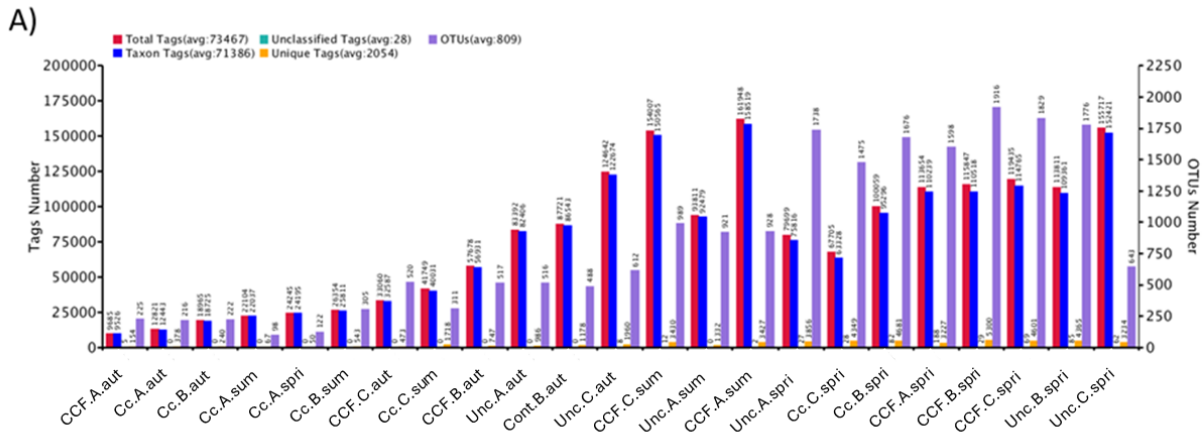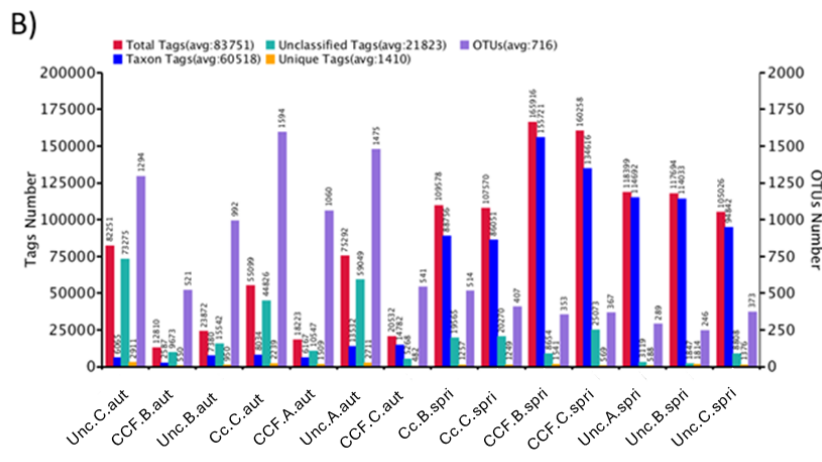

**Supplemental Figure 2.** The Y1-axis titled "Tags Number" means the number of tags; Total tags" (red bars) is the number of effective tags; Taxon Tags" (blue bars) is the number of annotated tags; Unclassified Tags" (green bars) is the number of unannotated tags; Unique Tags" (orange bars) is the number of tags with a frequency of 1 and only occurs in one sample. The Y2-axis titled "OTUs Numbers" means the number of OTUs, which are displayed as "OTUs" (purple bars) to identify the numbers of OTUs in different samples. Panel A is for bacterial (16S) samples and panel B for fungal (ITS2) samples.
